# Supplementary material for: Proton-coupled electron transfer promotes the reduction of ferrylmyoglobin by uric acid under physiological conditions
Source: Royal Society of Chemistry journal article supplement (doi:10.1039/c6ra28314d), 2017-01-01

## SUPPORTING INFORMATION

**Figure S1.** Stopped-flow kinetic traces obtained at 405 nm for the reduction of ferryl myoglobin by uric acid at increasing concentrations (A=  $0.150 \times 10^{-3} \text{ mol L}^{-1}$ , B =  $0.300 \times 10^{-3} \text{ mol L}^{-1}$ , C =  $0.375 \times 10^{-3} \text{ mol L}^{-1}$ , D =  $0.450 \times 10^{-3} \text{ mol L}^{-1}$  and E =  $0.600 \times 10^{-3} \text{ mol L}^{-1}$ ), best non-linear fitting parameter and regular residual for the best fit.  $k_{\text{obs}}$  were determined as  $1/t_1$  and an average value of three independent measurements ( $n=3$ ).

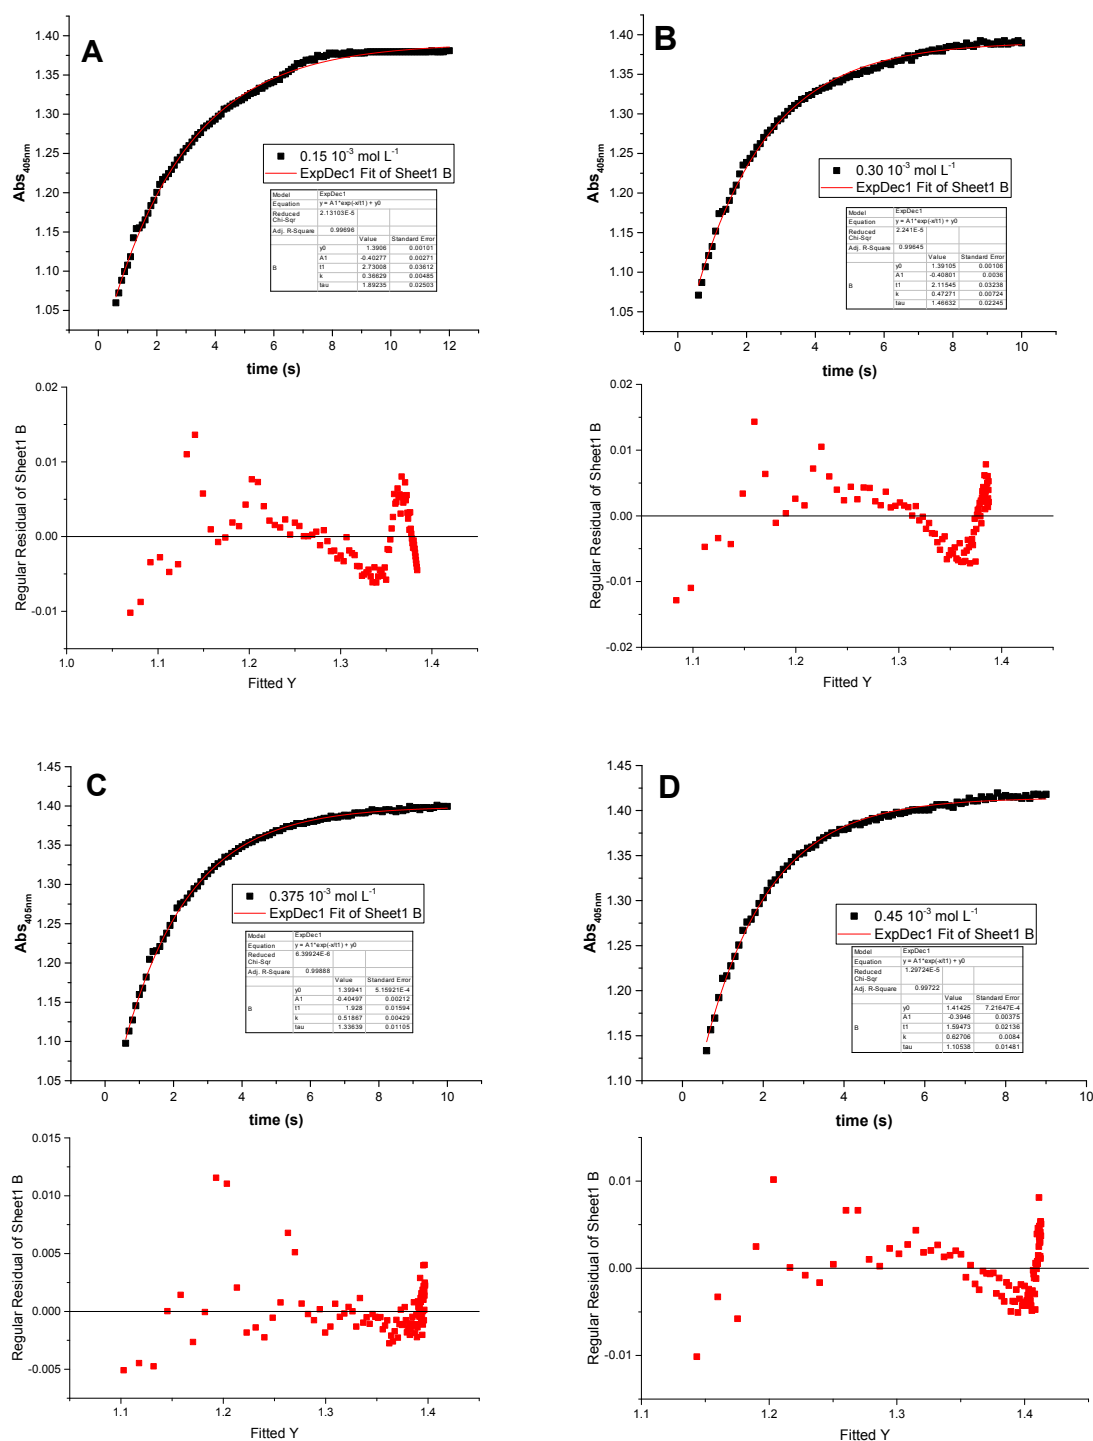

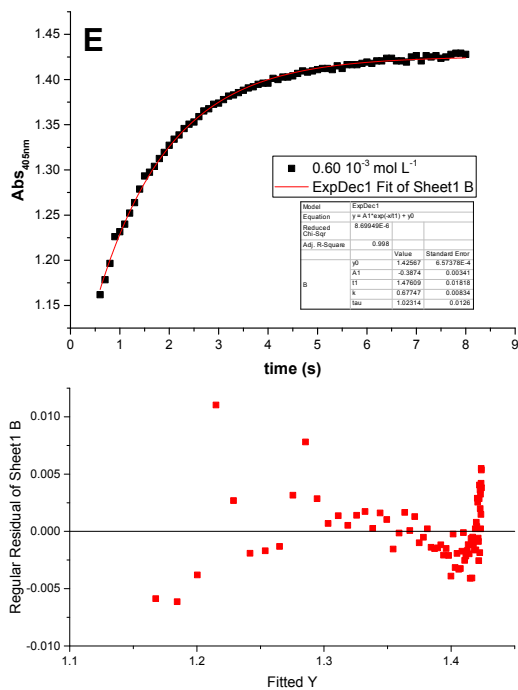

**Figure S 2.** Stopped-flow kinetic traces obtained at 580 nm for the reduction of ferryl myoglobin by uric acid at increasing concentrations ( $A = 0.150 \cdot 10^{-3} \text{ mol L}^{-1}$ ,  $B = 0.300 \cdot 10^{-3} \text{ mol L}^{-1}$ ,  $C = 0.375 \cdot 10^{-3} \text{ mol L}^{-1}$ ,  $D = 0.450 \cdot 10^{-3} \text{ mol L}^{-1}$  and  $E = 0.600 \cdot 10^{-3} \text{ mol L}^{-1}$ ), best non-linear fitting parameter and regular residual for the best fit.  $k_{\text{obs}}$  were determined as  $1/\tau$  and an average value of three independent measurements ( $n=3$ ).

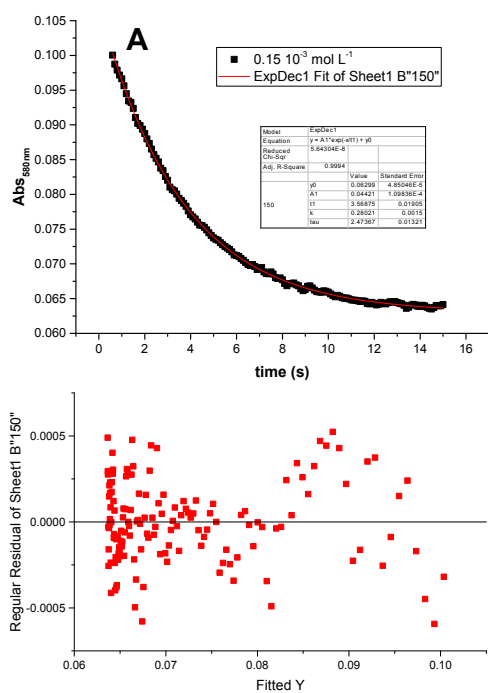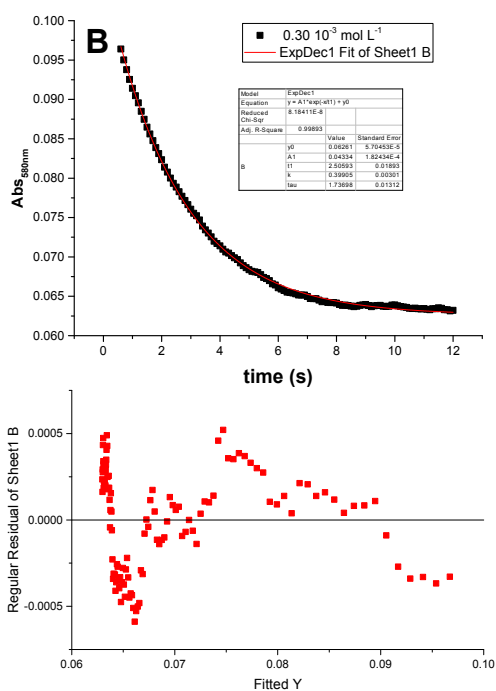

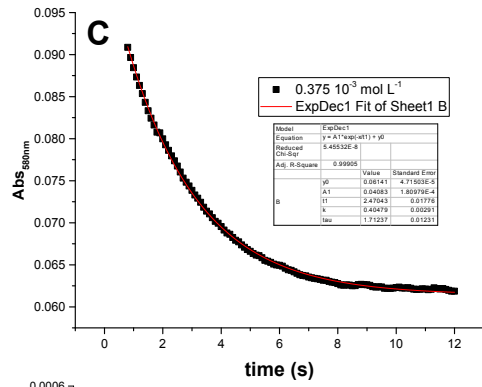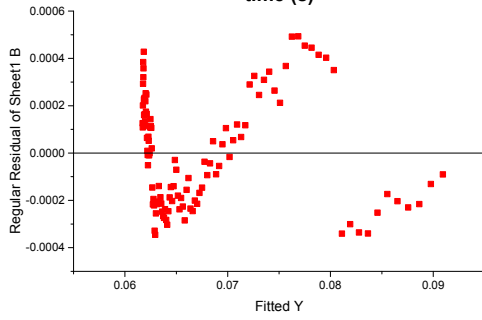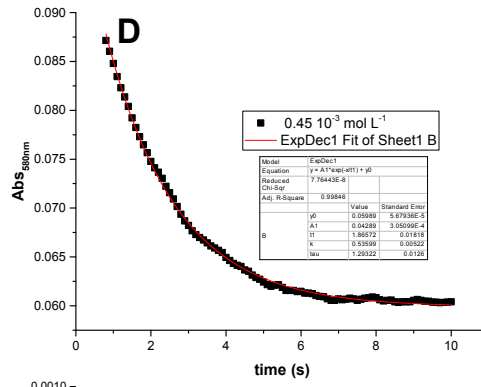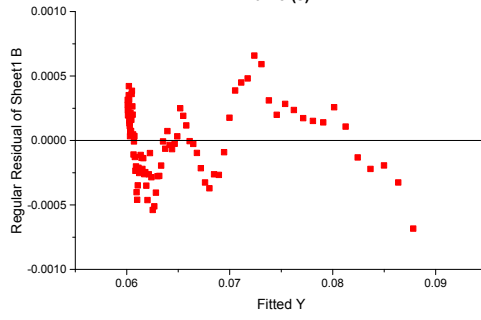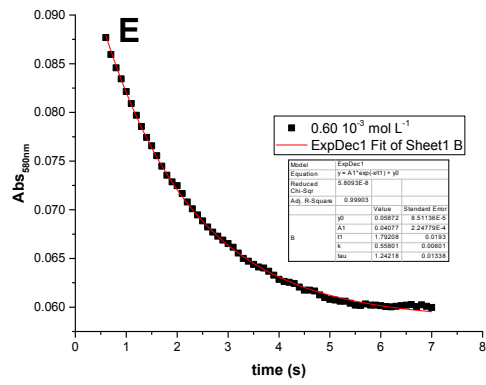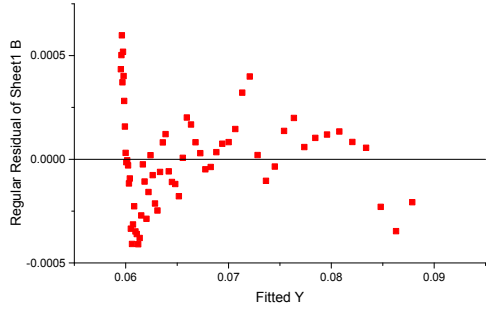

Supplement: c6ra28314d1.pdf [file c6ra28314d1.pdf]
